# Supplementary material for: In situ analysis of growth rate evolution during molecular layer deposition of ultra-thin polyurea films using aliphatic and aromatic precursors
Source: Royal Society of Chemistry journal article supplement (doi:10.1039/d1dt03689k), 2021-12-27
Supplement: d1dt03689k1.pdf [file d1dt03689k1.pdf]

ARTICLE

## In-situ analysis of growth rate evolution during molecular layer deposition of ultra-thin polyurea films using aliphatic and aromatic precursors

Received 20th October 2021,  
Accepted 00th January 20xx

DOI: 10.1039/x0xx00000x

Rachel A. Nye,<sup>a</sup> Siyao Wang,<sup>a</sup> Stefan Uhlenbrock,<sup>b</sup> John A. Smythe III,<sup>b</sup> and Gregory N. Parsons<sup>\*a</sup>

### Supporting Information

FTIR analysis of the HDIC/ED film is conducted at different thicknesses between 5-50 nm thick. Results are shown in Fig. S1. The intensity of the associated polyurea peaks, detailed in Fig. 6 in the Results Section, grow with increasing film thickness. There is no significant shifting of the amide peaks ( $\sim 1560\text{ cm}^{-1}$  and  $\sim 1620\text{ cm}^{-1}$ ) at these different thicknesses, indicating that for film thicknesses above 5 nm, the H-bonding strength within the film does not significantly change.

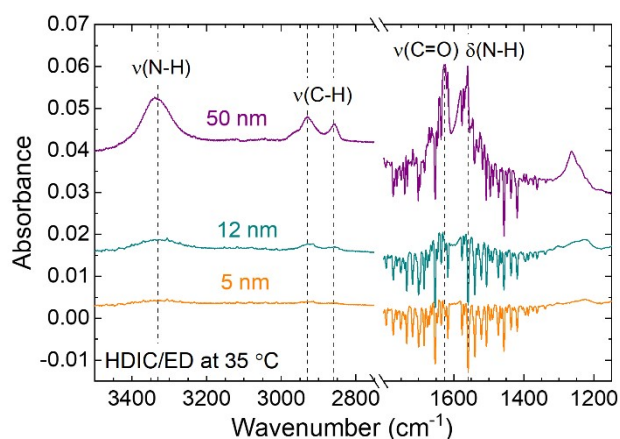

**Sup. Fig. 1** FTIR spectra of HDIC/ED films measuring 5 nm (orange), 12 nm (green), and 50 nm (purple) thick deposited at 35 °C on hydroxylated SiO<sub>2</sub>. Relevant polyurea peaks are highlighted.

<sup>a</sup> North Carolina State University, Department of Chemical and Biomolecular Engineering, 911 Partners Way, Raleigh, North Carolina 27606

<sup>b</sup> Micron Technology Inc, 8000 S Federal Way, Boise, Idaho 83716

Electronic Supplementary Information (ESI) available: [details of any supplementary information available should be included here]. See DOI: 10.1039/x0xx00000x
